# Supplementary material
Source: publisher site journal article supplement (https://study.sagepub.com/sites/default/files/03%20Bloomberg%203e%20Appendix%20H.pdf)
Supplement: Supplementary file 1 [file 03%20Bloomberg%203e%20Appendix%20H.pdf]

## Appendix H. Sample Overview of Information Needed

| Research Questions                                                                                                                          | Information Needed/What the Researcher Wants to Know                                                                                                     | Method                                    |
|---------------------------------------------------------------------------------------------------------------------------------------------|----------------------------------------------------------------------------------------------------------------------------------------------------------|-------------------------------------------|
| 1. To what extent do participants feel that the course work prepared them to conduct research and write their dissertations?                | Participants' perceptions about whether the course work prepared them for the dissertation process.                                                      | Interview                                 |
| 2. What do participants perceive they needed to learn to complete their degrees?                                                            | The kinds of knowledge, skills, and attitudes participants felt were important to carry out and write their dissertations.                               | Interview                                 |
| 3. How do participants attempt to develop what they perceived they needed to complete their dissertations?                                  | What activities did participants engage in to help develop the knowledge, skills, and attitudes to carry out the research and write their dissertations? | Interview, Critical Incident              |
| 4. What factors do participants perceive helped them complete their dissertations?                                                          | Who and what helped them? What kinds of supports enable them to progress?                                                                                | Interview, Critical Incident, Focus Group |
| 5. What factors do participants perceive impeded and/or continue to impede their progress in working toward completing their dissertations? | Obstacles that stood in the way of the participants; the stumbling blocks encountered.                                                                   | Interview, Critical Incident, Focus Group |
